# Supplementary material
Source: PubMed Central journal article supplement (PMC8102073)
Supplement: mmc6.pdf [file mmc6.pdf]

Execution steps:

**A) Prerequisites and input**

1. To run on the local computer, we need to install python (ok with *Python version 3.6* and above).
2. Create a directory, say the name: **AAA** (it can be any name)
3. For inferring host-virus interactions, we need two source fasta format files (CDS, nucleotide sequences): host (say, *H.fasta*) and virus (say, *V.fasta*), inside the same directory, **AAA**.
4. Save the below python script file (without any change) as the name specified: **X) main.py**, and also keep it inside the same directory, **AAA**.
5. There are several python modules (*Bio (SeqIO)*, *CAI (RSCU)*, *scipy.stats*) called from inside the *main.py* script; make sure those are already installed with python.

**B). Execution:**

1. The only *main.py* is needed for execution (or RUN); by default, **p-value is set to  $p < .001$**  for edge (host-viral interaction) selection with strong correlation score. Further, one can modify/add a single code for setting the correlation value range/cut off.
2. The only *main.py* is needed for execution (or RUN); by default, **p-value is set to  $<.001$** , which can be set as needed (strong correlation for lower p-value cut-off ) from the *main.py* file. Further, one can modify/add a single code for setting the correlation value range/cut off.

**C) Output:**

3. Output results will be saved as *result.csv*, where each row contains four entries (*host id; virus id, correlation value, p-value*). The host id and virus id are taken as it is from the fasta files. After modifying the csv file, it can be utilized for host-virus network reconstruction using Cytoscape and other software tools.

**X) main.py**

```
from Bio import SeqIO

from CAI import RSCU

import scipy.stats

N=['A','T','C','G']

C=[]

for i in range(4):

    for j in range(4):

        for k in range(4):

            C.append(N[i]+N[j]+N[k])

[C.remove(x) for x in {'ATG','TAA','TAG','TGA','TGG'}]

fid=open('Result.csv','w')

for seq1 in SeqIO.parse('H.fasta','fasta'):
```

```
ref1=[]
ref1.append(seq1.seq)
a=RSCU(ref1)
x=[0 for i in range(59)]
for i in range(59):
    x[i]=round(a[C[i]],3)
for seq2 in SeqIO.parse('V.fasta','fasta'):
    ref2=[]
    ref2.append(seq2.seq)
    b=RSCU(ref2)
    y=[0 for i in range(59)]
    for i in range(59):
        y[i]=round(b[C[i]],3)
    r,p=scipy.stats.pearsonr(x,y)
    if p<.001:
        fid.write("\n%s;%s;%s;%s'%(seq1.id,seq2.id,round(r,3),p))
        print(seq1.id,seq2.id,round(r,3),p)
fid.close()
```
